# Supplementary material for: Efflux-Related Carbapenem Resistance in Acinetobacter baumannii Is Associated with Two-Component Regulatory Efflux Systems’ Alteration and Insertion of ΔAbaR25-Type Island Fragment
Source: MDPI journal article supplement (doi:10.3390/ijms24119525), 2023-05-31
Supplement: s1 [file s1]

## Supplementary Materials

### “Efflux-Related Carbapenem Resistance in *Acinetobacter baumannii* is Associated with Two-component Regulatory Efflux Systems Alteration and Insertion of $\Delta$ AbaR25-type Island Fragment”

Alicja Słoczyńska, Matthew E. Wand, Lucy J. Bock, Stefan Tyski, and Agnieszka E. Laudy

**Table S1.** Epidemiological data, *bla*<sub>CHDL</sub> gene groups and antimicrobial susceptibility profiles of clinical isolates of *A. baumannii* (n=61) to eight antimicrobial agents which are substrates for AdeABC and AbeM efflux pumps.

| Groups of isolates carrying the following genes [9]                                       | Isolate | Antimicrobial agent (interpretation of susceptibility results) <sup>a</sup> |     |     |     |     |     |     |     | Clinical material        | Isolation year |
|-------------------------------------------------------------------------------------------|---------|-----------------------------------------------------------------------------|-----|-----|-----|-----|-----|-----|-----|--------------------------|----------------|
|                                                                                           |         | CAZ <sup>b</sup>                                                            | FEP | IMP | MEM | GEN | TOB | CIP | LEV |                          |                |
| <i>IS</i> Aba3-<br><i>bla</i> <sub>OXA-58-like</sub>                                      | AB1     | I                                                                           | I   | R   | R   | S   | S   | R   | I   | peritoneal fluid         | 2009           |
|                                                                                           | AB3     | I                                                                           | S   | R   | R   | S   | S   | R   | I   | urine                    | 2009           |
|                                                                                           | AB25    | I                                                                           | S   | R   | R   | S   | S   | R   | I   | stoma swab               | 2010           |
|                                                                                           | AB43    | R                                                                           | I   | R   | R   | R   | R   | R   | R   | fistula                  | 2010           |
|                                                                                           | AB52    | R                                                                           | I   | R   | R   | R   | R   | R   | R   | respiratory tract sample | 2010           |
|                                                                                           | AB62    | I                                                                           | I   | R   | R   | S   | S   | R   | I   | wound swab               | 2011           |
| <i>bla</i> <sub>OXA-51-like</sub><br><i>IS</i> Aba1-<br><i>bla</i> <sub>OXA-23-like</sub> | AB86    | R                                                                           | R   | R   | R   | S   | R   | R   | R   | urine                    | 2012           |
|                                                                                           | AB87    | R                                                                           | I   | R   | R   | R   | R   | R   | R   | urine                    | 2012           |
|                                                                                           | AB91    | R                                                                           | R   | R   | R   | R   | R   | R   | R   | respiratory tract sample | 2012           |
|                                                                                           | AB92    | R                                                                           | R   | R   | R   | S   | S   | R   | R   | respiratory tract sample | 2012           |
|                                                                                           | AB93    | R                                                                           | R   | R   | R   | R   | R   | R   | R   | urine                    | 2012           |
|                                                                                           | AB96    | R                                                                           | R   | R   | R   | R   | R   | R   | R   | respiratory tract sample | 2012           |
|                                                                                           | AB99    | R                                                                           | R   | R   | R   | R   | R   | R   | R   | respiratory tract sample | 2012           |
|                                                                                           | AB111   | R                                                                           | R   | R   | R   | S   | R   | R   | R   | urine                    | 2012           |
|                                                                                           | AB113   | R                                                                           | R   | R   | R   | R   | R   | R   | R   | urine                    | 2012           |
|                                                                                           | AB118   | R                                                                           | I   | R   | R   | S   | S   | R   | R   | rectal swab              | 2012           |
|                                                                                           | AB119   | R                                                                           | R   | R   | R   | S   | R   | R   | R   | stoma swab               | 2012           |
|                                                                                           | AB129   | R                                                                           | R   | R   | R   | S   | S   | R   | R   | urine                    | 2014           |
|                                                                                           | AB177   | R                                                                           | R   | R   | R   | R   | R   | R   | R   | rectal swab              | 2013           |
|                                                                                           | AB185   | R                                                                           | R   | R   | R   | R   | R   | R   | R   | urine                    | 2013           |
| <i>bla</i> <sub>OXA-24-like</sub>                                                         | AB34    | R                                                                           | R   | R   | R   | R   | R   | R   | I   | blood                    | 2010           |
|                                                                                           | AB37    | R                                                                           | I   | R   | R   | R   | R   | R   | R   | wound swab               | 2010           |
|                                                                                           | AB41    | R                                                                           | I   | R   | R   | R   | R   | R   | I   | wound swab               | 2010           |
|                                                                                           | AB42    | R                                                                           | R   | R   | R   | R   | R   | R   | R   | respiratory tract sample | 2010           |

|                                        |       |   |   |   |   |   |   |   |   |                          |      |
|----------------------------------------|-------|---|---|---|---|---|---|---|---|--------------------------|------|
|                                        | AB48  | R | I | R | R | R | R | R | I | urine                    | 2011 |
|                                        | AB76  | R | I | R | R | R | R | R | I | wound swab               | 2011 |
|                                        | AB78  | R | I | R | R | R | R | R | R | wound swab               | 2011 |
|                                        | AB79  | R | I | R | R | R | R | R | R | fistula                  | 2011 |
|                                        | AB81  | R | I | R | R | R | R | R | I | wound swab               | 2012 |
|                                        | AB120 | R | I | R | R | R | R | R | R | respiratory tract sample | 2012 |
|                                        | AB121 | R | R | R | R | R | R | R | I | blood                    | 2012 |
|                                        | AB123 | R | R | R | R | I | R | R | I | wound swab               | 2012 |
|                                        | AB124 | R | I | R | R | R | R | R | I | respiratory tract sample | 2012 |
|                                        | AB126 | R | R | R | R | R | R | R | I | urine                    | 2012 |
|                                        | AB127 | R | I | R | R | R | R | R | R | wound swab               | 2012 |
|                                        | AB142 | R | R | R | R | R | R | R | R | wound swab               | 2013 |
|                                        | AB145 | R | S | R | R | I | I | R | R | fistula                  | 2013 |
|                                        | AB149 | R | I | R | R | R | S | R | R | wound swab               | 2013 |
|                                        | AB153 | R | I | R | R | R | R | R | I | rectal swab              | 2013 |
|                                        | AB154 | R | I | R | R | R | R | R | I | blood                    | 2013 |
|                                        | AB156 | R | I | R | R | S | I | R | I | urine                    | 2013 |
|                                        | AB158 | R | I | R | R | I | I | R | I | stoma swab               | 2013 |
|                                        | AB159 | R | R | R | R | R | R | R | R | urine                    | 2013 |
|                                        | AB161 | R | I | R | R | R | R | R | I | respiratory tract sample | 2013 |
|                                        | AB163 | R | I | R | R | R | R | R | I | respiratory tract sample | 2013 |
|                                        | AB165 | R | I | R | R | R | R | R | I | respiratory tract sample | 2013 |
|                                        | AB167 | R | I | R | R | R | I | R | R | wound swab               | 2013 |
|                                        | AB168 | R | I | R | R | R | S | R | I | respiratory tract sample | 2013 |
|                                        | AB170 | R | R | R | R | R | R | R | I | catheter tip             | 2013 |
|                                        | AB172 | R | I | R | R | R | R | R | I | wound swab               | 2013 |
|                                        | AB174 | R | R | R | R | R | R | R | I | respiratory tract sample | 2013 |
|                                        | AB176 | R | I | R | R | R | R | R | I | urine                    | 2013 |
|                                        | AB180 | R | R | R | R | R | R | R | R | urine                    | 2013 |
|                                        | AB181 | R | I | R | R | R | R | R | I | urine                    | 2013 |
|                                        | AB183 | R | I | R | R | S | I | R | R | wound swab               | 2013 |
|                                        | AB190 | R | I | R | R | R | R | R | I | wound swab               | 2013 |
|                                        | AB192 | R | I | R | R | R | R | R | R | surgical drain swab      | 2013 |
|                                        | AB193 | R | I | R | R | R | R | R | R | respiratory tract sample | 2013 |
|                                        | AB195 | R | I | R | R | R | R | R | R | wound swab               | 2013 |
| <i>ISAb1-bla<sub>OXA-51</sub>-like</i> | AB23  | R | I | R | R | R | S | R | I | respiratory tract sample | 2010 |
|                                        | AB140 | R | S | I | R | R | R | R | R | rectal swab              | 2013 |

<sup>a</sup> Interpretation of MIC values of  $\beta$ -lactams as susceptibility of studied isolates were performed according to CLSI guidelines [54]. <sup>b</sup> CAZ, ceftazidime; FEP, cefepime; IMP,

imipenem; MEM, meropenem; GEN, gentamicin; TOB, tobramycin; CIP, ciprofloxacin; LEV, levofloxacin; R, resistant isolate; I, intermediate isolate; S, sensitive isolate.

**Table S2.** CarbAcineto NP test results and CCCP and PA $\beta$ N effect on the carbapenem MIC values results for the *bla*<sub>CHDL</sub>-carrying *A. baumannii* isolates (n=61).

| Groups of isolates carrying the following genes [9] | Isolate | MIC (mg/L)       |           |                   |     |           |                   | CarbAcineto NP test (time in minutes)  |
|-----------------------------------------------------|---------|------------------|-----------|-------------------|-----|-----------|-------------------|----------------------------------------|
|                                                     |         | IMP <sup>a</sup> | IMP +CCCP | IMP +PA $\beta$ N | MEM | MEM +CCCP | MEM +PA $\beta$ N |                                        |
| <i>bla</i> <sub>OXA-51-like</sub>                   | AB1     | 16               | 8         | 8                 | 8   | 4         | 4                 | Uninterpretable <sup>b</sup> (120 min) |
|                                                     | AB3     | 8                | 4         | 4                 | 8   | 4         | 4                 | Uninterpretable (120 min)              |
|                                                     | AB25    | 8                | 4         | 4                 | 8   | 4         | 4                 | Uninterpretable (120 min)              |
|                                                     | AB43    | 16               | 1         | 8                 | 64  | 32        | 16                | Uninterpretable (120 min)              |
|                                                     | AB52    | 16               | 8         | 16                | 8   | 4         | 4                 | Uninterpretable (120 min)              |
|                                                     | AB62    | 16               | 8         | 8                 | 8   | 4         | 4                 | Uninterpretable (120 min)              |
|                                                     | AB86    | 16               | 8         | 16                | 16  | 16        | 16                | Positive (45 min)                      |
|                                                     | AB87    | 16               | 8         | 4                 | 32  | 16        | 8                 | Positive (45 min)                      |
|                                                     | AB91    | 16               | 8         | 8                 | 16  | 16        | 8                 | Positive (45 min)                      |
|                                                     | AB92    | 16               | 8         | 8                 | 32  | 16        | 8                 | Positive (15 min)                      |
|                                                     | AB93    | 16               | 8         | 16                | 32  | 16        | 16                | Positive (45 min)                      |
|                                                     | AB96    | 32               | 16        | 16                | 32  | 16        | 8                 | Positive (25 min)                      |
|                                                     | AB99    | 16               | 16        | 16                | 16  | 8         | 8                 | Positive (100 min)                     |
|                                                     | AB111   | 32               | 16        | 16                | 64  | 32        | 16                | Positive (60 min)                      |
|                                                     | AB113   | 32               | 16        | 8                 | 64  | 32        | 8                 | Positive (45 min)                      |
|                                                     | AB118   | 32               | 16        | 16                | 64  | 32        | 16                | Positive (60 min)                      |
|                                                     | AB119   | 16               | 8         | 16                | 64  | 32        | 16                | Positive (60 min)                      |
|                                                     | AB129   | 8                | 8         | 4                 | 8   | 4         | 4                 | Uninterpretable (120 min)              |
| <i>bla</i> <sub>OXA-23-like</sub>                   | AB177   | 16               | 8         | 16                | 64  | 32        | 16                | Positive (75 min)                      |
|                                                     | AB185   | 16               | 8         | 8                 | 8   | 8         | 4                 | Uninterpretable (120 min)              |
|                                                     | AB34    | 64               | 64        | 64                | 128 | 128       | 64                | Positive (5 min)                       |
|                                                     | AB37    | 32               | 32        | 32                | 128 | 64        | 32                | Positive (45 min)                      |
|                                                     | AB41    | 16               | 16        | 16                | 64  | 32        | 32                | Positive (45 min)                      |
|                                                     | AB42    | 32               | 32        | 32                | 64  | 32        | 32                | Positive (45 min)                      |
|                                                     | AB48    | 16               | 16        | 16                | 64  | 32        | 32                | Uninterpretable (120 min)              |
|                                                     | AB76    | 64               | 32        | 32                | 128 | 128       | 64                | Positive (45 min)                      |
|                                                     | AB78    | 16               | 16        | 16                | 64  | 32        | 32                | Positive (45 min)                      |
|                                                     | AB79    | 64               | 32        | 32                | 128 | 128       | 64                | Positive (5 min)                       |
|                                                     | AB81    | 64               | 32        | 16                | 128 | 128       | 32                | Positive (35 min)                      |
|                                                     | AB120   | 32               | 16        | 16                | 64  | 32        | 32                | Uninterpretable (120 min)              |
|                                                     | AB121   | 64               | 32        | 32                | 128 | 128       | 64                | Positive (10 min)                      |

|                                   |       |    |    |    |     |     |     |                              |
|-----------------------------------|-------|----|----|----|-----|-----|-----|------------------------------|
|                                   | AB123 | 8  | 8  | 8  | 64  | 32  | 32  | Uninterpretable<br>(120 min) |
|                                   | AB124 | 32 | 16 | 16 | 64  | 32  | 32  | Uninterpretable<br>(120 min) |
|                                   | AB126 | 32 | 16 | 32 | 64  | 32  | 32  | Positive (30 min)            |
|                                   | AB127 | 16 | 16 | 16 | 128 | 128 | 64  | Positive (50 min)            |
|                                   | AB142 | 32 | 32 | 32 | 128 | 64  | 64  | Positive (100 min)           |
|                                   | AB145 | 16 | 8  | 8  | 128 | 64  | 64  | Positive (100 min)           |
|                                   | AB149 | 16 | 8  | 8  | 64  | 32  | 32  | Positive (100 min)           |
|                                   | AB153 | 32 | 8  | 16 | 64  | 32  | 32  | Positive (100 min)           |
|                                   | AB154 | 16 | 8  | 8  | 64  | 32  | 32  | Positive (100 min)           |
|                                   | AB156 | 16 | 16 | 16 | 128 | 64  | 64  | Positive (50 min)            |
|                                   | AB158 | 32 | 16 | 32 | 128 | 64  | 64  | Positive (50 min)            |
|                                   | AB159 | 32 | 32 | 32 | 32  | 32  | 32  | Positive (55 min)            |
|                                   | AB161 | 64 | 64 | 32 | 128 | 64  | 64  | Positive (5 min)             |
|                                   | AB163 | 64 | 32 | 32 | 128 | 64  | 64  | Positive (10 min)            |
|                                   | AB165 | 32 | 16 | 16 | 128 | 64  | 32  | Positive (25 min)            |
|                                   | AB167 | 64 | 32 | 32 | 128 | 128 | 64  | Positive (5 min)             |
|                                   | AB168 | 16 | 16 | 16 | 128 | 64  | 64  | Positive (20 min)            |
|                                   | AB170 | 16 | 16 | 16 | 64  | 32  | 32  | Positive (45 min)            |
|                                   | AB172 | 16 | 16 | 8  | 32  | 16  | 16  | Positive (45 min)            |
|                                   | AB174 | 64 | 64 | 32 | 128 | 64  | 64  | Positive (5 min)             |
|                                   | AB176 | 64 | 64 | 64 | 128 | 128 | 128 | Positive (5 min)             |
|                                   | AB180 | 16 | 16 | 16 | 64  | 32  | 32  | Positive (45 min)            |
|                                   | AB181 | 64 | 32 | 64 | 128 | 64  | 64  | Positive (5 min)             |
|                                   | AB183 | 8  | 8  | 8  | 64  | 32  | 32  | Positive (100 min)           |
|                                   | AB190 | 16 | 16 | 16 | 64  | 32  | 32  | Positive (100 min)           |
|                                   | AB192 | 16 | 8  | 16 | 64  | 32  | 32  | Uninterpretable<br>(120 min) |
|                                   | AB193 | 32 | 8  | 16 | 64  | 32  | 32  | Positive (100 min)           |
|                                   | AB195 | 32 | 16 | 16 | 128 | 128 | 16  | Positive (100 min)           |
| <i>ISAbal-<br/>blaOXA-51-like</i> | AB23  | 8  | 8  | 8  | 8   | 8   | 8   | Uninterpretable<br>(120 min) |
|                                   | AB140 | 4  | 4  | 4  | 16  | 16  | 8   | Uninterpretable<br>(120 min) |

<sup>a</sup> IMP, imipenem; MEM, meropenem; CCCP, an efflux pump inhibitor Carbonyl cyanide 3-chlorophenylhydrazone; PA $\beta$ N, an efflux pump inhibitor Ph-Arg- $\beta$ -naphthylamide.

<sup>b</sup> Uninterpretable result - compared to the internal control (red color tube), after the required incubation time (maximum 2 h), only the development of a red-orange color was observed in the test tube, but not the expected yellow or orange colors.

AB ATCC 17978 MKSKLGISKQLFIALTIVNLSVTLSVVLGYVIYNYAIEKGWISLSSFQQEDWTSFHFVDWIWLATVIFC  
 AB 96 MKSKLGISKQLFIALTIVNLSVTLSVVLGYVIYNYAIEKGWISLSSFQQEDWTSFHFVDWIWLATVIFC

GCIISLVIGMRLAKRFIVPINFLAEAAKKISHGDL SARAYDNRIHSAEMSELLYNFNDMAQKLEVS VKNAQV  
 GCIISLVIGMRLAKRFIVPINFLAEAAKKIS--DLSARAYDNRIHSAEMSELLYNFNDMAQKLEVS VKNAQV

WNAAIAHEL RTPITILQGRLQGIIDGVFKLDEVLFKSLNQVEGLSHLVEDLRTL SLVENQQLRLNYELF  
 WNAAIAHEL RTPITILQGRLQGIIDGVFKLDEVLFKSLNQVEGLSHLVEDLRTL SLVENQQLRLNYELF

DFKAVVEKVLKAFEDRLDQAKLVPDLTSTPVYCDRRRIEQVLI ALIDNAIRYSNAGKLKISSEVVSQN  
 DFKAVVEKVLKAFEDRLDQAKLVPDLTSTPVYCDRRRIEQVLI ALIDNAIRYSNAGKLKISSEVVSQN

WILKIEDEGPGIATEFQDDIYKPF FRLEESRNKEFGGTGLGLAVVHAI IVALKGTIQYSNQGSKS VFTIK  
 WILKIEDEGPGIATEFQDDIYKPF FRLEESRNKEFGGTGLGLAVVHAI IVALKGTIQYSNQGSKS VFTIK

ISMGEHEEIG  
 ISMGEHEEIG

G356N delE358  
 H357N delE359  
 delI360  
 delG361

delH102  
 delG103

L172P

G186V

N268H

Y303F

V348I

**Figure S1.** Sequence comparison of the AdeS protein of clinical isolate *A. baumannii* 96 (in orange font) and reference strain *A. baumannii* ATCC 17978 (in black font). The amino acid changes in AdeS are shown in the black boxes and additionally highlighted on a yellow background. The positions of the amino acid changes are given according to the AdeS protein of the reference strain.

## Methods

### Genome assembly

Raw nanopore data was basecalled using Guppy v6.1.3 in super accuracy mode (Oxford Nanopore Technologies, Oxford, UK). After quality filtering using NanoFilt [62] and residual adapter removal using Porechop (<https://github.com/rrwick/Porechop>) obtained dataset was quality checked using NanoPlot [62]. Long read assembly was performed using Tricycler pipeline [63]. In brief nanopore reads were initially assembled using four long read assemblers: flye, unicycler, Raven and miniasm. Long reads assemblies were next reconciled, circularized and final consensus was generated followed by polishing with racon and medaka. Long read assembled contigs were further polished using polypolish [64,65] and POLCA [66].

The remaining ambiguities in the genome assembly were verified by the PCR amplification of DNA fragments, followed by Sanger sequencing with an ABI3730xl Genetic Analyzer (Life Technologies) using BigDye Terminator Mix v. 3.1 chemistry (Life Technologies). All of the possible sequence errors and missassemblies were further manually corrected using Seqman software (DNASTar) to obtain complete nucleotide sequence of bacterial genome.

## References

(The numbering of references cited in supplementary materials is consistent with the reference list in the main article.)

9. Słoczyńska, A.; Wand, M.E.; Tyski, S.; Laudy, A.E. Analysis of *bla*<sub>CHDL</sub> genes and insertion sequences related to carbapenem resistance in *Acinetobacter baumannii* clinical strains isolated in Warsaw, Poland. *Int. J. Mol. Sci.* **2021**, *22*, doi:10.3390/ijms22052486.
54. Clinical and Laboratory Standards Institute M100: *Performance standards for antimicrobial susceptibility testing*. 32nd ed. CLSI; Wayne, PA, USA: **2022**
62. De Coster, W.; D'Hert, S.; Schultz, D.T.; Cruts, M.; Van Broeckhoven, C. NanoPack: visualizing and processing long-read sequencing data. *Bioinformatics* **2018**, *34*, 2666-2669, doi:10.1093/bioinformatics/bty149.
63. Wick, R.R.; Judd, L.M.; Cerdeira, L.T.; Hawkey, J.; Meric, G.; Vezina, B.; Wyres, K.L.; Holt, K.E. Tricycler: consensus long-read assemblies for bacterial genomes. *Genome Biol.* **2021**, *22*, 266, doi:10.1186/s13059-021-02483-z.
64. <https://github.com/rrwick/Polypolish> - accessed on 10.05.2023
65. Wick, R.R.; Holt, K.E. Polypolish: Short-read polishing of long-read bacterial genome assemblies. *PLoS Comput. Biol.* **2022**, *18*, e1009802, doi:10.1371/journal.pcbi.1009802.
66. Zimin, A.V.; Puiu, D.; Luo, M.C.; Zhu, T.; Koren, S.; Marcais, G.; Yorke, J.A.; Dvorak, J.; Salzberg, S.L. Hybrid assembly of the large and highly repetitive genome of *Aegilops tauschii*, a progenitor of bread wheat, with the MaSuRCA mega-reads algorithm. *Genome Res.* **2017**, *27*, 787-792, doi:10.1101/gr.213405.116.
